# Supplementary material
Source: PubMed Central journal article supplement (PMC1567875)
Supplement: pnas_0604897103_2.pdf [file pnas_0604897103_2.pdf]

## Supporting Methods

For data evaluation we followed the methods of statistical data analysis as described in detail in ref. 10. The posterior probability  $p(\text{model} | \text{data}, I)$  that a model is able to fit the experimental data, given some initial information  $I$  on the model parameters is given by

$$p(\text{model} | \text{data}, I) = \frac{p(\text{data} | \text{model}, I) \times p(\text{model} | I)}{p(\text{data} | I)} \quad [2]$$

where  $p(\text{data} | \text{model}, I)$  gives the likelihood function (e.g., least squares) that the data fit the model,  $p(\text{model} | I)$  describes the prior probability that the model is valid, and  $p(\text{data} | I)$  gives the probability that a certain data set can be measured given  $I$ . The prior probability describes our state of knowledge or ignorance on the problem (e.g., positiveness of model parameters).

In general, a model may contain several parameters  $a_i$ ,  $i = 1, \dots, n$ , of which some ( $a_l$ ,  $l = 1, \dots, m$ ) are of interest and others, so called nuisance parameters ( $a_k$ ,  $k = m + 1, \dots, n$ ), are not. By integrating the probability distribution over the nuisance parameters, a process called marginalization, one obtains a new probability distribution that depends only on the relevant parameters:

$$p(\{a_l\}) = \int_{-\infty}^{+\infty} \dots \int_{-\infty}^{+\infty} p(\{a_i\}) da_{m+1} \dots da_n. \quad [3]$$

The best estimates of these parameters and their uncertainties are then obtained in the usual way: They are given by the parameter values at the maximum of  $p(\{a_l\})$  and the inverse of the covariance matrix at that point,

$$[\sigma^2]_{ij} = -[\{\nabla \nabla \log[p(\{a_l\})]\}^{-1}]_{ij}. \quad [4]$$

In our particular case the detector signal  $I(\nu, d)$  at a certain frequency,  $\nu$ , and a water layer thickness,  $d$ , is described by

$$I(d, \nu) = I_{0, \nu} \exp(-\alpha(\nu)d) + C \quad [5]$$

where  $I_{0, \nu}$ ,  $\alpha(\nu)$ ,  $d$ , and  $C$  correspond to the terahertz signal without probe, the absorption coefficient of the probe, the layer thickness of the probe, and the detector offset, respectively. Only  $\alpha$  is of interest, so  $I_{0, \nu}$  and  $C$  may be treated as nuisance parameters. Because the model above is linear in both nuisance parameters, the integration can be performed analytically.

A summary of all absorption coefficients with their error bars which were determined following this approach at a frequency of  $80 \text{ cm}^{-1}$  is shown in Fig. 6. In total,  $> 100$  measurements were carried out over a frequency range from  $73$  to  $91 \text{ cm}^{-1}$ .

Equ. 2 may now be used to quantitatively compare how well different models with e.g., a different number of parameters describe a certain data set. It is clear that a larger number of parameters will give a better fit in the least-squares sense. However, are these just fitting parameters or do the additional parameters contain new information?

Consider two models A and B that are used to describe a given data set. The ratio of the posterior probabilities that the models fit the data is given by

$$\frac{p(A|D, I)}{p(B|D, I)} = \frac{p(D|A, I)}{p(D|B, I)} \times \frac{p(A|I)}{p(B|I)}. \quad [6]$$

Under the assumptions that we can estimate a reasonable parameter range for  $\lambda$

$$\lambda_{\min} \leq \lambda \leq \lambda_{\max}, \quad [7]$$

that we have no *a priori* knowledge on  $\lambda$  so that the according prior is uniform between  $\lambda_{\min}$  and  $\lambda_{\max}$  and zero elsewhere and that the probability distribution

$$p(D|\lambda, B, I) = p(D|\lambda_0, B, I) \times \exp\left(-\frac{(\lambda - \lambda_0)^2}{2\delta\lambda^2}\right) \quad [8]$$

is well approximated by a Gaussian probability distribution function, we can use marginalization to finally get

$$\frac{p(A|D, I)}{p(B|D, I)} = \frac{p(A|I)}{p(B|I)} \times \frac{p(D|A, I)}{p(D|\lambda_0, B, I)} \times \frac{\lambda_{\max} - \lambda_{\min}}{\delta\lambda\sqrt{2\pi}}. \quad [9]$$

This equation can be easily generalized to cases of several variables.

In our particular case we want to compare the two-component model A with parameters  $\{a_i\}$  and the three-component model B with parameters  $\{b_i\}$ , including two additional parameters, the effective radius  $r_{\text{solv}}$  and the absorption coefficient  $\alpha_{\text{solv}}$  of the solvation shell, with our measurements of the overall absorption coefficient versus frequency. Because the different measurements are statistically independent,

$$p(A|D, I) \propto \prod_{i=1}^N \exp\left(-\frac{(D_i - A(\{a_k\})_i)^2}{\sigma_i^2}\right), \quad [10]$$

where  $D_i$  is the  $i$ th data point, and  $A(\{a_k\})_i$  and  $\sigma_i$  are the corresponding model value and measurement uncertainty, respectively. A similar equation holds for model B. The best fit parameters for both models are given by the sets of parameter values  $\{a_{k,0}\}$  and  $\{b_{k,0}\}$ .

For the comparison of the two component and three component models presented in this paper we used an uncertainty range  $0 \text{ cm}^{-1} \leq \alpha_{\text{solv}} \leq 1,000 \text{ cm}^{-1}$  for the absorption coefficient of the solvation shell and  $0 \text{ \AA} \leq r_{\text{solv}} \leq 20 \text{ \AA}$  for its radius. The probability ratio is then given by

$$\frac{p(B|D, I)}{p(A|D, I)} = \exp\left(-\left[\sum_{i=1}^N \frac{(D_i - B(\{b_{k,0}\})_i)^2}{\sigma_i^2} - \sum_{i=1}^N \frac{(D_i - A(\{a_{k,0}\})_i)^2}{\sigma_i^2}\right]\right) \times \frac{\alpha_{\text{solv, max}} - \alpha_{\text{solv, min}}}{\delta\alpha_{\text{solv}}\sqrt{2\pi}} \times \frac{r_{\text{solv, max}} - r_{\text{solv, min}}}{\delta r_{\text{solv}}\sqrt{2\pi}}. \quad [11]$$

The average probability ratio of three-component model versus the two-component model at the investigated frequencies is  $7.5 \times 10^{14}$ .

---

[10] Sivia, D. (1996) *Data Analysis: A Bayesian Tutorial* (Clarendon Press, Oxford).
