# Supplementary material
Source: PubMed Central journal article supplement (PMC1567875)

$\nu = 80 \text{ cm}^{-1}$

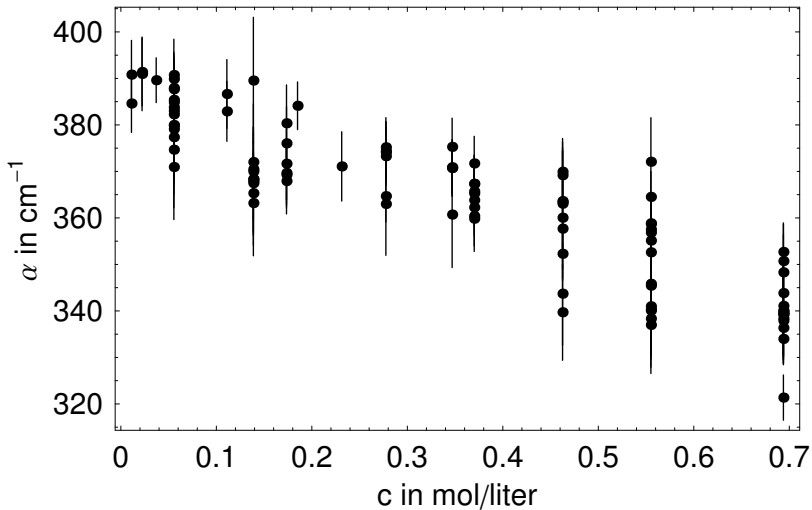

Supplement: pnas_0604897103_1.pdf [file pnas_0604897103_1.pdf]
